# Supplementary material for: Clinicopathologic characteristics and prognostic significance of HER2-low expression in patients with early breast cancer: A systematic review and meta-analysis
Source: Frontiers journal article supplement (doi:10.3389/fonc.2023.1100332), 2023-02-02
Supplement: Data_Sheet_1.zip [file Supplementary Table 3. NOS.doc]

Supplementary Table 3. Newcastle - Ottawa Quality Assessment Scale for the included studies

| **Study** | **Selection** | | | | **Comparability** | **Outcome** | | | **Quality Score** |
| --- | --- | --- | --- | --- | --- | --- | --- | --- | --- |
|  | **Representativeness of the exposed cohort** | **Selection of the non exposed cohort** | **Ascertainment of exposure** | **Demonstration that outcome of interest was not present at start of study** | **Comparability of cohorts on the basis of the design or analysis** | **Assessment of outcome** | **Was follow-up long enough for outcomes to occur** | **Adequacy of follow up of cohorts** |  |
| Carsten Denkert et al,17 2021 | ★ | ★ | ★ | ★ | ★ | ★ | ★ | ★ | 8 |
| Camille Domergue et al,18 2022 | ★ | ★ | ★ | ★ | ★ | ★ | ★ | ★ | 8 |
| Ryan Shea Ying Cong Tan et al,19 2022 | ★ | ★ | ★ | ★ | ★ | ★ | ★ | ★ | 8 |
| George Douganiotis et al,20 2022 | ★ | ★ | ★ | ★ | ★ | ★ | ★ | ★ | 8 |
| Christopher Rosso et al,21 2022 |  |  | ★ | ★ | ★ | ★ | ★ | ★ | 6 |
| Nanae Horisawa et al,22 2022 | ★ | ★ | ★ | ★ | ★ | ★ | ★ | ★ | 8 |
| Luciana de Moura Leite et al,23 2021 | ★ | ★ | ★ | ★ | ★ | ★ | ★ | ★ | 8 |
| Raz Mutai et al,24 2021 | ★ | ★ | ★ | ★ | ★ | ★ | ★ | ★ | 8 |
| William Jacot et al,25 2021 | ★ | ★ | ★ | ★ | ★ | ★ | ★ | ★ | 8 |
| Paolo Tarantino et al,26 2022 | ★ | ★ | ★ | ★ | ★ | ★ |  | ★ | 7 |
| Mengdi Chen et al,27 2022 | ★ | ★ | ★ | ★ | ★ | ★ | ★ | ★ | 8 |
| Han  gcheng Xu et al,28 2022 | ★ | ★ | ★ | ★ | ★★ | ★ | ★ | ★ | 9 |
| Min Hwan Kim et al,29 2020 | ★ | ★ | ★ | ★ | ★ | ★ | ★ | ★ | 8 |
| Louis Fehrenbacher et al,30 2019 |  |  | ★ | ★ | ★ | ★ | ★ | ★ | 6 |
